# Supplementary material for: Coping of Chronically-Ill Patients during the COVID-19 Pandemic: Comparison between Four Groups
Source: MDPI journal article supplement (doi:10.3390/ijerph20064814), 2023-03-09
Supplement: s1 [file s1]

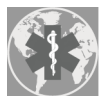

## Supplementary file 1

### Rho Spearman range correlations for coping strategies in relation to age. .

|                              | Age       |
|------------------------------|-----------|
| Acceptance                   | −0.147 ** |
| Active coping                | −0.172 ** |
| Self-blame                   | −0.291 ** |
| Planning                     | −0.104 *  |
| Humor                        | −0.172 ** |
| Emotional support            | −0.119 *  |
| Use of informational support | −0.162 ** |
| Positive reframing           | −0.093    |
| Venting                      | −0.276 ** |
| Self-distraction             | −0.159 ** |
| Denial                       | −0.028    |
| Behavioral disengagement     | 0.010     |
| Substance use                | −0.296 ** |
| Religion                     | 0.166 **  |
| Problem-Focused Coping       | −0.151 ** |
| Emotion-Focused Coping       | −0.221 ** |
| Avoidant Coping              | −0.163 ** |

\*  $p < 0.05$ ; \*\*  $p < 0.01$ .

### Coping strategies in relation to gender.

|                              | female<br>(n = 238) |        | male<br>(n = 160) |        | U        | p      | rg   |
|------------------------------|---------------------|--------|-------------------|--------|----------|--------|------|
|                              | Mdn                 | Mrang  | Mdn               | Mrang  |          |        |      |
| Acceptance                   | 2.00                | 205.22 | 2.00              | 190.99 | 17678.50 | 0.216  | 0.07 |
| Active coping                | 2.00                | 205.36 | 2.00              | 190.78 | 17645.50 | 0.206  | 0.07 |
| Self-blame                   | 1.00                | 215.50 | 1.00              | 175.70 | 15232.50 | 0.001  | 0.20 |
| Planning                     | 2.00                | 201.31 | 2.00              | 196.81 | 18609.00 | 0.695  | 0.02 |
| Humor                        | 1.00                | 197.26 | 1.00              | 202.83 | 18507.00 | 0.627  | 0.03 |
| Emotional support            | 2.00                | 210.49 | 1.50              | 183.16 | 16425.00 | 0.018  | 0.14 |
| Use of informational support | 1.50                | 214.60 | 1.50              | 177.04 | 15446.50 | 0.001  | 0.19 |
| Positive reframing           | 2.00                | 211.08 | 1.50              | 182.28 | 16284.50 | 0.013  | 0.14 |
| Venting                      | 1.50                | 223.44 | 1.00              | 163.89 | 13343.00 | <0.001 | 0.30 |
| Self-distraction             | 1.50                | 207.95 | 1.50              | 186.93 | 17029.00 | 0.069  | 0.11 |
| Denial                       | 1.00                | 214.57 | 0.50              | 177.09 | 15454.50 | 0.001  | 0.19 |
| Behavioral disengagement     | 0.50                | 210.32 | 0.50              | 183.41 | 16465.50 | 0.018  | 0.14 |
| Substance use                | 0.00                | 204.62 | 0.00              | 191.88 | 17821.00 | 0.166  | 0.06 |
| Religion                     | 1.00                | 205.06 | 0.50              | 191.23 | 17716.00 | 0.218  | 0.07 |
| Problem-Focused Coping       | 1.75                | 208.81 | 1.75              | 185.65 | 16824.00 | 0.048  | 0.12 |
| Emotion-Focused Coping       | 1.33                | 218.01 | 1.17              | 171.96 | 14633.50 | <0.001 | 0.23 |
| Avoidant Coping              | 0.88                | 216.20 | 0.75              | 174.66 | 15065.00 | <0.001 | 0.21 |

Mdn – median; Mrang – mean range; U – U Mann-Whitney test result; p – p-value; rg – Glass's estimator of effect size.

### Coping strategies in relation to employment status.

|                              | employed<br>(n = 31) |       | unemployed<br>(n = 26) |       | U      | p     | rg   |
|------------------------------|----------------------|-------|------------------------|-------|--------|-------|------|
|                              | Mdn                  | Mrang | Mdn                    | Mrang |        |       |      |
| Acceptance                   | 1.50                 | 32.08 | 1.25                   | 25.33 | 307.50 | 0.119 | 0.24 |
| Active coping                | 2.00                 | 32.73 | 1.50                   | 24.56 | 287.50 | 0.057 | 0.29 |
| Self-blame                   | 1.50                 | 32.08 | 1.00                   | 25.33 | 307.50 | 0.121 | 0.24 |
| Planning                     | 2.00                 | 34.81 | 1.00                   | 22.08 | 223.00 | 0.003 | 0.45 |
| Humor                        | 1.00                 | 30.19 | 0.75                   | 27.58 | 366.00 | 0.540 | 0.09 |
| Emotional support            | 2.00                 | 33.69 | 1.00                   | 23.40 | 257.50 | 0.017 | 0.36 |
| Use of informational support | 1.50                 | 33.58 | 1.25                   | 23.54 | 261.00 | 0.020 | 0.35 |
| Positive reframing           | 1.50                 | 31.50 | 1.50                   | 26.02 | 325.50 | 0.205 | 0.19 |
| Venting                      | 1.50                 | 34.02 | 1.00                   | 23.02 | 247.50 | 0.011 | 0.39 |
| Self-distraction             | 2.00                 | 33.26 | 1.25                   | 23.92 | 271.00 | 0.032 | 0.33 |
| Denial                       | 1.00                 | 29.98 | 1.00                   | 27.83 | 372.50 | 0.613 | 0.08 |
| Behavioral disengagement     | 0.50                 | 30.37 | 0.50                   | 27.37 | 360.50 | 0.481 | 0.11 |
| Substance use                | 1.00                 | 33.47 | 0.00                   | 23.67 | 264.50 | 0.017 | 0.34 |
| Religion                     | 0.00                 | 27.56 | 0.00                   | 30.71 | 358.50 | 0.421 | 0.11 |
| Problem-Focused Coping       | 1.63                 | 32.81 | 1.50                   | 24.46 | 285.00 | 0.058 | 0.29 |
| Emotion-Focused Coping       | 1.33                 | 32.50 | 1.21                   | 24.83 | 294.50 | 0.081 | 0.27 |
| Avoidant Coping              | 1.13                 | 33.71 | 0.88                   | 23.38 | 257.00 | 0.019 | 0.36 |

Mdn – median; Mrang – mean range; U – U Mann-Whitney test result; *p* – *p*-value; rg – Glass's estimator of effect size.

### Coping strategies in relation to education.

|   | I: primary<br>(n = 25) |        | II: middle<br>(n = 79) |        | III: higher<br>(n = 119) |        | H(2)  | p       | ε <sup>2</sup> | Post-hoc                  |
|---|------------------------|--------|------------------------|--------|--------------------------|--------|-------|---------|----------------|---------------------------|
|   | Mdn                    | Mrang  | Mdn                    | Mrang  | Mdn                      | Mrang  |       |         |                |                           |
| a | 0.50                   | 62.16  | 2.00                   | 110.46 | 2.00                     | 123.50 | 19.53 | < 0.001 | 0.088          | a.I < a.II; a.I < a.III   |
| b | 1.50                   | 90.64  | 2.00                   | 109.47 | 2.00                     | 118.17 | 4.08  | 0.130   | 0.018          |                           |
| c | 0.50                   | 74.86  | 1.00                   | 116.67 | 1.00                     | 116.70 | 9.63  | 0.008   | 0.043          | c.I < c.II; c.I < c.III   |
| d | 1.50                   | 82.44  | 2.00                   | 110.51 | 2.00                     | 119.20 | 7.03  | 0.030   | 0.032          | d.I < d.III               |
| e | 0.50                   | 87.66  | 1.00                   | 105.97 | 1.00                     | 121.11 | 6.92  | 0.031   | 0.031          | e.I < e.III               |
| f | 1.00                   | 94.98  | 1.00                   | 106.92 | 2.00                     | 118.95 | 3.74  | 0.154   | 0.017          |                           |
| g | 1.00                   | 85.06  | 1.50                   | 113.11 | 1.50                     | 116.92 | 5.24  | 0.073   | 0.024          |                           |
| h | 1.00                   | 88.66  | 1.50                   | 106.36 | 2.00                     | 120.65 | 6.24  | 0.044   | 0.028          | h.I < h.III               |
| i | 1.00                   | 79.26  | 1.00                   | 103.23 | 1.50                     | 124.70 | 13.03 | 0.001   | 0.059          | i.I < i.III; i.II < i.III |
| j | 1.00                   | 89.50  | 1.50                   | 115.73 | 1.50                     | 114.25 | 3.56  | 0.169   | 0.016          |                           |
| k | 1.00                   | 106.68 | 1.00                   | 111.36 | 1.00                     | 113.54 | 0.26  | 0.877   | 0.001          |                           |
| l | 0.00                   | 96.96  | 0.50                   | 114.09 | 0.50                     | 113.77 | 1.64  | 0.441   | 0.007          |                           |
| m | 0.00                   | 108.20 | 0.00                   | 105.70 | 0.00                     | 116.98 | 1.97  | 0.374   | 0.009          |                           |
| n | 0.00                   | 100.54 | 0.00                   | 110.01 | 0.00                     | 115.73 | 1.51  | 0.471   | 0.007          |                           |
| o | 1.38                   | 89.24  | 1.75                   | 108.96 | 1.75                     | 118.80 | 4.62  | 0.099   | 0.021          |                           |
| p | 0.92                   | 72.92  | 1.25                   | 107.20 | 1.33                     | 123.40 | 13.37 | 0.001   | 0.060          | p.I < p.II; p.I < p.III   |
| q | 0.75                   | 93.24  | 0.88                   | 110.84 | 0.88                     | 116.71 | 2.79  | 0.248   | 0.013          |                           |

a– acceptance; b– active coping; c– self-blame; d– planning; e– humor; f– emotional support; g– use of informational support; h– positive reframing; i– venting; j– self-distraction; k– denial; l– behavioral disengagement; m– substance use; n– religion; o– problem-focused coping; p– emotion-focused coping; q– avoidant coping. Mdn– median; Mrang– mean range; H– Kruskal-Wallis test result; *p*– *p*-value; ε<sup>2</sup>– effect size.

### Coping strategies in distinct subgroups – interactive approach.

|       |                   | <i>M</i> | <i>SD</i> | <i>F</i> | <i>p</i> | $\eta^2$ | <i>Post-hoc</i>  |
|-------|-------------------|----------|-----------|----------|----------|----------|------------------|
| A     | Problem-focused   | 1.67     | 0.69      | 377.65   | 0.000    | 0.482    | B < A            |
| B     | Emotions-focused  | 1.24     | 0.50      |          |          |          | C < A            |
| C     | Avoidant          | 0.86     | 0.49      |          |          |          | C < B            |
| I     | Psoriasis         | 1.13     | 0.69      | 4.89     | 0.002    | 0.036    | I < II           |
| II    | Multiple Scleroma | 1.36     | 0.62      |          |          |          |                  |
| III   | Kidney Transplant | 1.23     | 0.68      |          |          |          |                  |
| IV    | Dialyses          | 1.29     | 0.62      |          |          |          |                  |
| I.A   |                   | 1.51     | 0.78      | 3.94     | 0.002    | 0.015    | I.B < I.A; I.C < |
| I.B   |                   | 1.10     | 0.55      |          |          |          | I.A; I.C < I.B;  |
| I.C   |                   | 0.79     | 0.51      |          |          |          | II.B < II.A;     |
| II.A  |                   | 1.75     | 0.63      |          |          |          | II.C < II.A;     |
| II.B  |                   | 1.33     | 0.45      |          |          |          | II.C < II.B;     |
| II.C  |                   | 1.01     | 0.52      |          |          |          | III.B < III.A;   |
| III.A |                   | 1.75     | 0.67      |          |          |          | III.C < III.A;   |
| III.B |                   | 1.22     | 0.46      |          |          |          | III.C < III.B;   |
| III.C |                   | 0.71     | 0.41      |          |          |          | IV.B < IV.A;     |
| IV.A  |                   | 1.64     | 0.64      |          |          |          | IV.C < IV.A;     |
| IV.B  |                   | 1.29     | 0.52      |          |          |          | IV.C < IV.B;     |
|       |                   |          |           |          |          |          | I.A < II.A; I.A  |
|       |                   |          |           |          |          |          | < III.A; I.B <   |
|       |                   |          |           |          |          |          | II.B; I.B <      |
| IV.C  |                   | 0.92     | 0.48      |          |          |          | IV.B; I.C <      |
|       |                   |          |           |          |          |          | II.C; III.C <    |
|       |                   |          |           |          |          |          | II.C; III.C <    |
|       |                   |          |           |          |          |          | IV.C;            |

M – mean; SD – standard deviation; F– ANOVA test result; p – p-value;  $\eta^2$  – eta-2 estimator of effect.
